# Supplementary material for: Synthesis, structure, and conduction mechanism of the lithium superionic conductor Li10+δGe1+δP2−δS12
Source: Royal Society of Chemistry journal article supplement (doi:10.1039/c4ta05231e), 2014-11-19
Supplement: c4ta05231e1.pdf [file c4ta05231e1.pdf]

## Electronic Supplementary Information

### Synthesis, Structure and Conduction Mechanism of the Lithium Superionic Conductor $\text{Li}_{10+\delta}\text{Ge}_{1+\delta}\text{P}_{2-\delta}\text{S}_{12}$

Ohmin Kwon,<sup>a</sup> Masaaki Hirayama,<sup>a</sup> Kota Suzuki,<sup>a</sup> Yuki Kato,<sup>b</sup> Toshiya Saito,<sup>b</sup> Masao Yonemura,<sup>c</sup> Takashi Kamiyama,<sup>c</sup> Ryoji Kanno\*,<sup>a</sup>

<sup>a</sup> Department of Electronic Chemistry, Interdisciplinary Graduate School of science and Engineering, Tokyo Institute of Technology, 4259 Nagatsuta, Midori, Yokohama, Kanagawa 226-8502, Japan

<sup>b</sup> Battery Research Division, Higashifuji Technical Center, Toyota Motor Corporation, 1200 Mishuku, Susono, Shizuoka 410-1193, Japan

<sup>c</sup> Neutron Science Laboratory, Institute of Materials Structure Science, High Energy Accelerator Research Organization (KEK), 1-1 Oho, Tsukuba, Ibaraki 305-0801, Japan

Corresponding Author: [kanno@echem.titech.ac.jp](mailto:kanno@echem.titech.ac.jp)

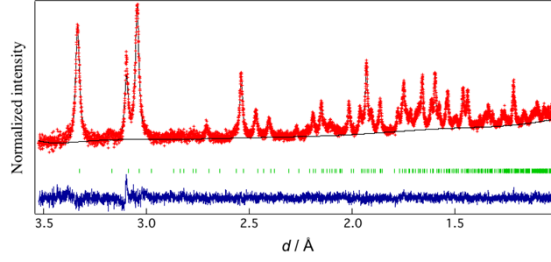

Figure S1. Neutron Rietveld refinement pattern of  $\text{Li}_{10.5}\text{Ge}_{1.5}\text{P}_{1.5}\text{S}_{12}$  at 300 K. Red: observed intensities; black: calculated intensities; blue: difference plot. The green markers indicate the positions of the diffraction lines.

Table S1. (a) Rietveld refinement results for  $\text{Li}_{10.5}\text{Ge}_{1.5}\text{P}_{1.5}\text{S}_{12}$  at 300 K ( $\text{Li}_{10+\delta}\text{Ge}_{1+\delta}\text{P}_{2-\delta}\text{S}_{12}$ ,  $\delta = 0.50$ )

| Atom  | Site | $g$        | $x$               | $y$               | $z$               | $U / \text{Å}^2$  |
|-------|------|------------|-------------------|-------------------|-------------------|-------------------|
| Ge(1) | 4d   | 0.750 (15) | 0                 | 1/2               | 0.6902 (2)        | 0.039             |
| P(1)  | 4d   | 0.250 (15) | = $x(\text{Ge}1)$ | = $y(\text{Ge}1)$ | = $z(\text{Ge}1)$ | = $B(\text{Ge}1)$ |
| Ge(2) | 2b   | 0.00 (3)   | 0                 | 0                 | 1/2               | 0.034             |
| P(2)  | 2b   | 1.00 (3)   | = $x(\text{Ge}2)$ | = $y(\text{Ge}2)$ | = $z(\text{Ge}2)$ | = $B(\text{Ge}2)$ |
| S(1)  | 8g   | 1          | 0                 | 0.1897 (5)        | 0.4099 (4)        | 0.027             |
| S(2)  | 8g   | 1          | 0                 | 0.29268 (6)       | 0.0971 (4)        | 0.034             |
| S(3)  | 8g   | 1          | 0                 | 0.6953 (6)        | 0.7911 (4)        | 0.025             |
| Li(1) | 16h  | 0.51 (3)   | 0.2557 (17)       | 0.2624 (18)       | 0.1915 (12)       | 0.110             |
| Li(2) | 4d   | 1.00 (4)   | 0                 | 1/2               | 0.9431 (9)        | 0.070             |
| Li(3) | 8f   | 0.75 (4)   | = $y(\text{Li}3)$ | 0.2478 (9)        | 0                 | 0.121             |
| Li(4) | 4c   | 0.67 (8)   | 0                 | 0                 | 0.233 (2)         | 0.111             |

  

| Atom  | $U_{11} / \text{Å}^2$  | $U_{22} / \text{Å}^2$  | $U_{33} / \text{Å}^2$  | $U_{12} / \text{Å}^2$  | $U_{13} / \text{Å}^2$   | $U_{23} / \text{Å}^2$  |
|-------|------------------------|------------------------|------------------------|------------------------|-------------------------|------------------------|
| Ge(1) | 0.064 (3)              | 0.031 (2)              | 0.022 (2)              | 0                      | 0                       | 0                      |
| P(1)  | = $U_{11}(\text{Ge}1)$ | = $U_{22}(\text{Ge}1)$ | = $U_{33}(\text{Ge}1)$ | = $U_{12}(\text{Ge}1)$ | = $U_{13}(\text{Ge}1)$  | = $U_{23}(\text{Ge}1)$ |
| Ge(2) | = $U_{22}(\text{Ge}2)$ | 0.023 (3)              | 0.057 (5)              | 0                      | 0                       | 0                      |
| P(2)  | = $U_{11}(\text{Ge}2)$ | = $U_{22}(\text{Ge}2)$ | = $U_{33}(\text{Ge}2)$ | = $U_{12}(\text{Ge}2)$ | = $U_{13}(\text{Ge}2)$  | = $U_{23}(\text{Ge}2)$ |
| S(1)  | 0.052 (4)              | 0.008 (3)              | 0.021 (4)              | 0                      | 0                       | 0.012 (2)              |
| S(2)  | 0.055 (5)              | 0.019 (4)              | 0.029 (5)              | 0                      | 0                       | -0.015 (3)             |
| S(3)  | 0.046 (4)              | 0.011 (4)              | 0.018 (4)              | 0                      | 0                       | 0.012 (3)              |
| Li(1) | 0.053 (9)              | 0.056 (10)             | 0.222 (19)             | 0.014 (6)              | -0.045 (6)              | -0.056 (11)            |
| Li(2) | 0.118 (9)              | 0.069 (7)              | 0.024 (5)              | 0                      | 0                       | 0                      |
| Li(3) | = $U_{22}(\text{Li}3)$ | 0.055 (6)              | 0.254 (16)             | -0.015 (6)             | = $-U_{23}(\text{Li}3)$ | -0.067 (4)             |
| Li(4) | 0.110 (2)              | 0.143 (3)              | 0.081 (3)              | 0                      | 0                       | 0                      |

Space group  $P4_2/nmc$ ,  $a = 8.7025(11) \text{ Å}$ ,  $c = 12.6251(3) \text{ Å}$ ,  $R_{\text{wp}} = 3.27\%$ ,  $R_p = 2.77\%$ .

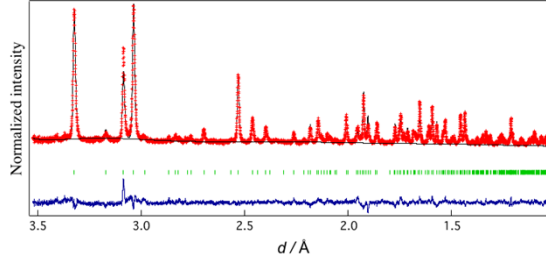

Figure S2. Neutron Rietveld refinement pattern of  $\text{Li}_{10.35}\text{Ge}_{1.35}\text{P}_{1.65}\text{S}_{12}$  at 4.8 K. Red: observed intensities; black: calculated intensities; blue: difference plot. The green markers indicate the positions of the diffraction lines.

Table S2. Rietveld refinement results for  $\text{Li}_{10.35}\text{Ge}_{1.35}\text{P}_{1.65}\text{S}_{12}$  at 4.8 K ( $\text{Li}_{10+\delta}\text{Ge}_{1+\delta}\text{P}_{2-\delta}\text{S}_{12}$ ,  $\delta = 0.35$ )

| Atom  | Site | $g$        | $x$         | $y$         | $z$         | $U / \text{Å}^2$ |
|-------|------|------------|-------------|-------------|-------------|------------------|
| Ge(1) | 4d   | 0.675 (8)  | 0           | 1/2         | 0.6891 (10) | 0.033            |
| P(1)  | 4d   | 0.325 (8)  | = $x$ (Ge1) | = $y$ (Ge1) | = $z$ (Ge1) | = $B$ (Ge1)      |
| Ge(2) | 2b   | 0.00 (2)   | 0           | 0           | 1/2         | 0.043            |
| P(2)  | 2b   | 1.00 (2)   | = $x$ (Ge2) | = $y$ (Ge2) | = $z$ (Ge2) | = $B$ (Ge2)      |
| S(1)  | 8g   | 1          | 0           | 0.1892 (2)  | 0.4082 (2)  | 0.0184 (5)       |
| S(2)  | 8g   | 1          | 0           | 0.2936 (2)  | 0.0935 (2)  | 0.0081 (5)       |
| S(3)  | 8g   | 1          | 0           | 0.7009 (2)  | 0.7910 (2)  | 0.0067 (5)       |
| Li(1) | 16h  | 0.462 (18) | 0.2388 (7)  | 0.2675 (9)  | 0.1865 (9)  | 0.073            |
| Li(2) | 4d   | 1.00 (2)   | 0           | 1/2         | 0.9428 (4)  | 0.016 (2)        |
| Li(3) | 8f   | 0.79 (3)   | = $y$ (Li3) | 0.2461 (4)  | 0           | 0.102            |
| Li(4) | 4c   | 0.738 (17) | 0           | 0           | 0.2507 (4)  | 0.008 (3)        |

  

| Atom  | $U_{11} / \text{Å}^2$ | $U_{22} / \text{Å}^2$ | $U_{33} / \text{Å}^2$ | $U_{12} / \text{Å}^2$ | $U_{13} / \text{Å}^2$ | $U_{23} / \text{Å}^2$ |
|-------|-----------------------|-----------------------|-----------------------|-----------------------|-----------------------|-----------------------|
| Ge(1) | 0.052 (10)            | 0.0213 (9)            | 0.0251 (11)           | 0                     | 0                     | 0                     |
| P(1)  | = $U_{11}$ (Ge1)      | = $U_{22}$ (Ge1)      | = $U_{33}$ (Ge1)      | = $U_{12}$ (Ge1)      | = $U_{13}$ (Ge1)      | = $U_{23}$ (Ge1)      |
| Ge(2) | = $U_{22}$ (Ge2)      | 0.0323 (8)            | 0.0629 (8)            | 0                     | 0                     | 0                     |
| P(2)  | = $U_{11}$ (Ge2)      | = $U_{22}$ (Ge2)      | = $U_{33}$ (Ge2)      | = $U_{12}$ (Ge2)      | = $U_{13}$ (Ge2)      | = $U_{23}$ (Ge2)      |
| Li(1) | 0.052 (7)             | 0.050 (8)             | 0.117 (9)             | 0.019 (4)             | -0.065 (5)            | -0.048 (5)            |
| Li(3) | = $U_{22}$ (Li3)      | 0.065 (5)             | 0.177 (9)             | -0.043 (4)            | =- $U_{23}$ (Li3)     | 0.093 (5)             |

Space group  $P4_2/nmc$ ,  $a = 8.67026$  (5) Å,  $c = 12.6031$  (12) Å,  $R_{\text{wp}} = 3.61\%$ ,  $R_p = 2.97\%$ .

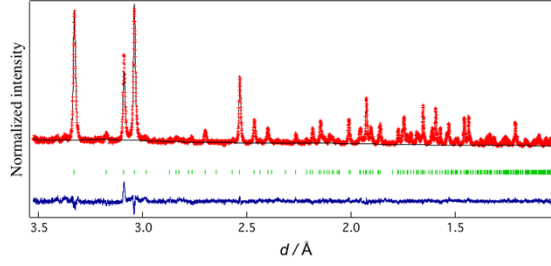

Figure S3. Neutron Rietveld refinement pattern of  $\text{Li}_{10.35}\text{Ge}_{1.35}\text{P}_{1.65}\text{S}_{12}$  at 135 K. Red: observed intensities; black: calculated intensities; blue: difference plot. The green markers indicate the positions of the diffraction lines.

Table S3. Rietveld refinement results for  $\text{Li}_{10.35}\text{Ge}_{1.35}\text{P}_{1.65}\text{S}_{12}$  at 135 K ( $\text{Li}_{10+\delta}\text{Ge}_{1+\delta}\text{P}_{2-\delta}\text{S}_{12}$ ,  $\delta = 0.35$ )

| Atom  | Site | $g$        | $x$               | $y$               | $z$               | $U / \text{Å}^2$  |
|-------|------|------------|-------------------|-------------------|-------------------|-------------------|
| Ge(1) | 4d   | 0.675 (8)  | 0                 | 1/2               | 0.6888 (10)       | 0.036             |
| P(1)  | 4d   | 0.325 (8)  | = $x(\text{Ge1})$ | = $y(\text{Ge1})$ | = $z(\text{Ge1})$ | = $B(\text{Ge1})$ |
| Ge(2) | 2b   | 0.00 (2)   | 0                 | 0                 | 1/2               | 0.048             |
| P(2)  | 2b   | 1.00 (2)   | = $x(\text{Ge2})$ | = $y(\text{Ge2})$ | = $z(\text{Ge2})$ | = $B(\text{Ge2})$ |
| S(1)  | 8g   | 1          | 0                 | 0.1900 (2)        | 0.4073 (2)        | 0.032             |
| S(2)  | 8g   | 1          | 0                 | 0.2944 (4)        | 0.0970 (2)        | 0.037             |
| S(3)  | 8g   | 1          | 0                 | 0.7005 (9)        | 0.7892 (8)        | 0.043             |
| Li(1) | 16h  | 0.465 (14) | 0.2453 (9)        | 0.2642 (9)        | 0.1875 (8)        | 0.102             |
| Li(2) | 4d   | 1.00 (10)  | 0                 | 1/2               | 0.9475 (5)        | 0.040             |
| Li(3) | 8f   | 0.76 (2)   | = $y(\text{Li3})$ | 0.2454 (4)        | 0                 | 0.116             |
| Li(4) | 4c   | 0.74 (2)   | 0                 | 0                 | 0.2540 (8)        | 0.048             |

  

| Atom  | $U_{11} / \text{Å}^2$  | $U_{22} / \text{Å}^2$  | $U_{33} / \text{Å}^2$  | $U_{12} / \text{Å}^2$  | $U_{13} / \text{Å}^2$   | $U_{23} / \text{Å}^2$  |
|-------|------------------------|------------------------|------------------------|------------------------|-------------------------|------------------------|
| Ge(1) | 0.0440 (15)            | 0.0343 (14)            | 0.0282 (11)            | 0                      | 0                       | 0                      |
| P(1)  | = $U_{11}(\text{Ge1})$ | = $U_{22}(\text{Ge1})$ | = $U_{33}(\text{Ge1})$ | = $U_{12}(\text{Ge1})$ | = $U_{13}(\text{Ge1})$  | = $U_{23}(\text{Ge1})$ |
| Ge(2) | = $U_{22}(\text{Ge2})$ | 0.042 (2)              | 0.060 (3)              | 0                      | 0                       | 0                      |
| P(2)  | = $U_{11}(\text{Ge2})$ | = $U_{22}(\text{Ge2})$ | = $U_{33}(\text{Ge2})$ | = $U_{12}(\text{Ge2})$ | = $U_{13}(\text{Ge2})$  | = $U_{23}(\text{Ge2})$ |
| S(1)  | 0.056 (2)              | 0.010 (2)              | 0.029 (2)              | 0                      | 0                       | -0.003 (10)            |
| S(2)  | 0.026 (2)              | 0.045 (3)              | 0.041 (3)              | 0                      | 0                       | -0.013 (2)             |
| S(3)  | 0.044 (2)              | 0.045 (2)              | 0.041 (2)              | 0                      | 0                       | -0.005 (2)             |
| Li(1) | 0.053 (9)              | 0.054 (9)              | 0.198(14)              | 0.025 (5)              | -0.067 (8)              | -0.085 (9)             |
| Li(2) | 0.055 (5)              | 0.036 (5)              | 0.029 (5)              | 0                      | 0                       | 0                      |
| Li(3) | = $U_{22}(\text{Li3})$ | 0.059 (6)              | 0.231 (11)             | -0.047 (5)             | =- $U_{23}(\text{Li3})$ | 0.085 (4)              |
| Li(4) | 0.029 (9)              | 0.032 (9)              | 0.084 (9)              | 0                      | 0                       | 0                      |

Space group  $P4_2/nmc$ ,  $a = 8.67989 (5) \text{ Å}$ ,  $c = 12.6121 (2) \text{ Å}$ ,  $R_{\text{wp}} = 3.28\%$ ,  $R_{\text{p}} = 2.76\%$ .

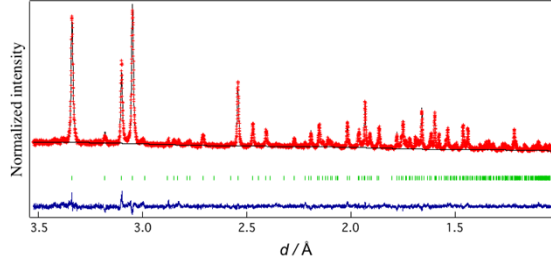

Figure S4. Neutron Rietveld refinement pattern of  $\text{Li}_{10.35}\text{Ge}_{1.35}\text{P}_{1.65}\text{S}_{12}$  at 300 K. Red: observed intensities; black: calculated intensities; blue: difference plot. The green markers indicate the positions of the diffraction lines.

Table S4. Rietveld refinement results for  $\text{Li}_{10.35}\text{Ge}_{1.35}\text{P}_{1.65}\text{S}_{12}$  at 300 K ( $\text{Li}_{10+\delta}\text{Ge}_{1+\delta}\text{P}_{2-\delta}\text{S}_{12}$ ,  $\delta = 0.35$ )

| Atom  | Site | $g$        | $x$               | $y$               | $z$               | $U / \text{\AA}^2$ |
|-------|------|------------|-------------------|-------------------|-------------------|--------------------|
| Ge(1) | 4d   | 0.675 (12) | 0                 | 1/2               | 0.6885 (10)       | 0.046              |
| P(1)  | 4d   | 0.325 (12) | = $x(\text{Ge}1)$ | = $y(\text{Ge}1)$ | = $z(\text{Ge}1)$ | = $B(\text{Ge}1)$  |
| Ge(2) | 2b   | 0.00 (2)   | 0                 | 0                 | 1/2               | 0.046              |
| P(2)  | 2b   | 1.00 (2)   | = $x(\text{Ge}2)$ | = $y(\text{Ge}2)$ | = $z(\text{Ge}2)$ | = $B(\text{Ge}2)$  |
| S(1)  | 8g   | 1          | 0                 | 0.1920 (2)        | 0.4090 (2)        | 0.046              |
| S(2)  | 8g   | 1          | 0                 | 0.2958 (2)        | 0.0989 (2)        | 0.048              |
| S(3)  | 8g   | 1          | 0                 | 0.7005 (3)        | 0.7885 (2)        | 0.035              |
| Li(1) | 16h  | 0.473 (11) | 0.2477 (9)        | 0.2616 (13)       | 0.2018 (11)       | 0.108              |
| Li(2) | 4d   | 1          | 0                 | 1/2               | 0.9524 (4)        | 0.060              |
| Li(3) | 8f   | 0.75 (2)   | = $y(\text{Li}3)$ | 0.2463 (4)        | 0                 | 0.118              |
| Li(4) | 4c   | 0.77 (2)   | 0                 | 0                 | 0.2585 (7)        | 0.077              |

  

| Atom  | $U_{11} / \text{\AA}^2$ | $U_{22} / \text{\AA}^2$ | $U_{33} / \text{\AA}^2$ | $U_{12} / \text{\AA}^2$ | $U_{13} / \text{\AA}^2$ | $U_{23} / \text{\AA}^2$ |
|-------|-------------------------|-------------------------|-------------------------|-------------------------|-------------------------|-------------------------|
| Ge(1) | 0.052 (10)              | 0.044 (14)              | 0.043 (13)              | 0                       | 0                       | 0                       |
| P(1)  | = $U_{11}(\text{Ge}1)$  | = $U_{22}(\text{Ge}1)$  | = $U_{33}(\text{Ge}1)$  | = $U_{12}(\text{Ge}1)$  | = $U_{13}(\text{Ge}1)$  | = $U_{23}(\text{Ge}1)$  |
| Ge(2) | = $U_{22}(\text{Ge}2)$  | 0.038 (11)              | 0.062 (3)               | 0                       | 0                       | 0                       |
| P(2)  | = $U_{11}(\text{Ge}2)$  | = $U_{22}(\text{Ge}2)$  | = $U_{33}(\text{Ge}2)$  | = $U_{12}(\text{Ge}2)$  | = $U_{13}(\text{Ge}2)$  | = $U_{23}(\text{Ge}2)$  |
| S(1)  | 0.078 (2)               | 0.023 (2)               | 0.038 (3)               | 0                       | 0                       | 0.014 (10)              |
| S(2)  | 0.055 (2)               | 0.036 (2)               | 0.052 (3)               | 0                       | 0                       | -0.010 (10)             |
| S(3)  | 0.044 (2)               | 0.009 (2)               | 0.052 (2)               | 0                       | 0                       | 0.002 (2)               |
| Li(1) | 0.074 (8)               | 0.050 (8)               | 0.20 (2)                | 0.019                   | -0.097 (11)             | -0.059 (11)             |
| Li(2) | 0.104 (4)               | 0.051(6)                | 0.024 (5)               | 0                       | 0                       | 0                       |
| Li(3) | = $U_{22}(\text{Li}3)$  | 0.048 (5)               | 0.259 (11)              | -0.0335 (3)             | = $-U_{23}(\text{Li}3)$ | -0.0929 (4)             |
| Li(4) | 0.026 (9)               | 0.096 (11)              | 0.108 (10)              | 0                       | 0                       | 0                       |

Space group  $P4_2/nmc$ ,  $a = 8.713023$  (5)  $\text{\AA}$ ,  $c = 12.639695$  (2)  $\text{\AA}$ ,  $R_{\text{wp}} = 3.06\%$ ,  $R_{\text{p}} = 2.52\%$ .

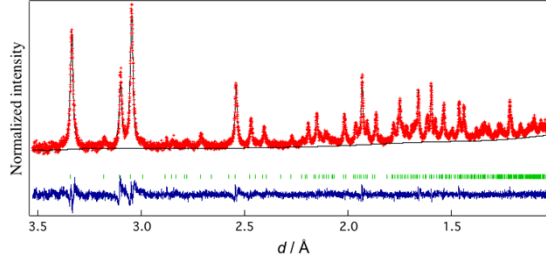

Figure S5. Neutron Rietveld refinement pattern of  $\text{Li}_{10.2}\text{Ge}_{1.2}\text{P}_{1.8}\text{S}_{12}$  at 300 K. Red: observed intensities; black: calculated intensities; blue: difference plot. The green markers indicate the positions of the diffraction lines.

Table S5. Rietveld refinement results for  $\text{Li}_{10.2}\text{Ge}_{1.2}\text{P}_{1.8}\text{S}_{12}$  at 300 K ( $\text{Li}_{10+\delta}\text{Ge}_{1+\delta}\text{P}_{2-\delta}\text{S}_{12}$ ,  $\delta = 0.20$ )

| Atom  | Site | $g$      | $x$               | $y$               | $z$               | $U / \text{\AA}^2$ |
|-------|------|----------|-------------------|-------------------|-------------------|--------------------|
| Ge(1) | 4d   | 0.60 (2) | 0                 | 1/2               | 0.6904 (2)        | 0.026              |
| P(1)  | 4d   | 0.40 (2) | = $x(\text{Ge}1)$ | = $y(\text{Ge}1)$ | = $z(\text{Ge}1)$ | = $B(\text{Ge}1)$  |
| Ge(2) | 2b   | 0.00 (3) | 0                 | 0                 | 1/2               | 0.032              |
| P(2)  | 2b   | 1.00 (3) | = $x(\text{Ge}2)$ | = $y(\text{Ge}2)$ | = $z(\text{Ge}2)$ | = $B(\text{Ge}2)$  |
| S(1)  | 8g   | 1        | 0                 | 0.1870 (4)        | 0.4092 (3)        | 0.024              |
| S(2)  | 8g   | 1        | 0                 | 0.2952 (5)        | 0.0976 (4)        | 0.029              |
| S(3)  | 8g   | 1        | 0                 | 0.6967 (5)        | 0.7920 (3)        | 0.027              |
| Li(1) | 16h  | 0.43 (2) | 0.2572 (16)       | 0.2678 (16)       | 0.1867 (14)       | 0.112              |
| Li(2) | 4d   | 1.00 (4) | 0                 | 1/2               | 0.9473 (2)        | 0.079              |
| Li(3) | 8f   | 0.80 (4) | = $y(\text{Li}3)$ | 0.2436 (7)        | 0                 | 0.176              |
| Li(4) | 4c   | 0.78 (6) | 0                 | 0                 | 0.2443 (13)       | 0.089              |

  

| Atom  | $U_{11} / \text{\AA}^2$ | $U_{22} / \text{\AA}^2$ | $U_{33} / \text{\AA}^2$ | $U_{12} / \text{\AA}^2$ | $U_{13} / \text{\AA}^2$ | $U_{23} / \text{\AA}^2$ |
|-------|-------------------------|-------------------------|-------------------------|-------------------------|-------------------------|-------------------------|
| Ge(1) | 0.046 (2)               | 0.024 (2)               | 0.0090 (13)             | 0                       | 0                       | 0                       |
| P(1)  | = $U_{11}(\text{Ge}1)$  | = $U_{22}(\text{Ge}1)$  | = $U_{33}(\text{Ge}1)$  | = $U_{12}(\text{Ge}1)$  | = $U_{13}(\text{Ge}1)$  | = $U_{23}(\text{Ge}1)$  |
| Ge(2) | = $U_{22}(\text{Ge}2)$  | 0.030 (3)               | 0.036 (4)               | 0                       | 0                       | 0                       |
| P(2)  | = $U_{11}(\text{Ge}2)$  | = $U_{22}(\text{Ge}2)$  | = $U_{33}(\text{Ge}2)$  | = $U_{12}(\text{Ge}2)$  | = $U_{13}(\text{Ge}2)$  | = $U_{23}(\text{Ge}2)$  |
| S(1)  | 0.040 (3)               | 0.015 (3)               | 0.018 (3)               | 0                       | 0                       | 0.013 (2)               |
| S(2)  | 0.036 (4)               | 0.025 (3)               | 0.026 (4)               | 0                       | 0                       | -0.006 (2)              |
| S(3)  | 0.042 (4)               | 0.025 (3)               | 0.014 (3)               | 0                       | 0                       | 0.006 (2)               |
| Li(1) | 0.051 (17)              | 0.054 (16)              | 0.23 (2)                | 0.030 (2)               | -0.026 (2)              | -0.034 (2)              |
| Li(2) | 0.099 (12)              | 0.079 (11)              | 0.058 (10)              | 0                       | 0                       | 0                       |
| Li(3) | = $U_{22}(\text{Li}3)$  | 0.081 (10)              | 0.366 (10)              | -0.068 (8)              | = $-U_{23}(\text{Li}3)$ | -0.125 (9)              |
| Li(4) | 0.058 (18)              | 0.11 (2)                | 0.098 (16)              | 0                       | 0                       | 0                       |

Space group  $P4_2/nmc$ ,  $a = 8.7043 (2) \text{\AA}$ ,  $c = 12.6160 (2) \text{\AA}$ ,  $R_{\text{wp}} = 3.99\%$ ,  $R_p = 3.40\%$ .

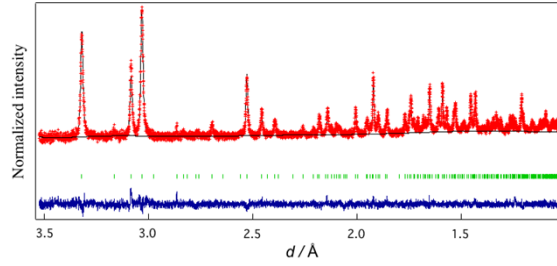

Figure S6. Neutron Rietveld refinement pattern of  $\text{Li}_{10.05}\text{Ge}_{1.05}\text{P}_{1.95}\text{S}_{12}$  at 10 K. Red: observed intensities; black: calculated intensities; blue: difference plot. The green markers indicate the positions of the diffraction lines.

Table S6. Rietveld refinement results for  $\text{Li}_{10.05}\text{Ge}_{1.05}\text{P}_{1.95}\text{S}_{12}$  at 10 K. ( $\text{Li}_{10+\delta}\text{Ge}_{1+\delta}\text{P}_{2-\delta}\text{S}_{12}$ ,  $\delta = 0.05$ )

| Atom  | Site | $g$        | $x$               | $y$               | $z$               | $U / \text{\AA}^2$ |
|-------|------|------------|-------------------|-------------------|-------------------|--------------------|
| Ge(1) | 4d   | 0.525 (13) | 0                 | 1/2               | 0.6898 (2)        | 0.0061 (9)         |
| P(1)  | 4d   | 0.475 (13) | = $x(\text{Ge}1)$ | = $y(\text{Ge}1)$ | = $z(\text{Ge}1)$ | = $B(\text{Ge}1)$  |
| Ge(2) | 2b   | 0.00 (3)   | 0                 | 0                 | 1/2               | 0.008 (2)          |
| P(2)  | 2b   | 1.00 (3)   | = $x(\text{Ge}2)$ | = $y(\text{Ge}2)$ | = $z(\text{Ge}2)$ | = $B(\text{Ge}2)$  |
| S(1)  | 8g   | 1          | 0                 | 0.1882 (4)        | 0.4089 (3)        | 0.0069 (19)        |
| S(2)  | 8g   | 1          | 0                 | 0.2949 (5)        | 0.0944 (3)        | 0.0033 (18)        |
| S(3)  | 8g   | 1          | 0                 | 0.6993 (4)        | 0.7912 (3)        | 0.0015 (18)        |
| Li(1) | 16h  | 0.36 (2)   | 0.2463 (19)       | 0.276 (2)         | 0.1799 (18)       | 0.086              |
| Li(2) | 4d   | 1.00 (3)   | 0                 | 1/2               | 0.9449 (8)        | 0.029              |
| Li(3) | 8f   | 0.89 (3)   | = $y(\text{Li}3)$ | 0.2461 (6)        | 0                 | 0.097              |
| Li(4) | 4c   | 0.78 (5)   | 0                 | 0                 | 0.2520 (14)       | 0.060              |

  

| Atom  | $U_{11} / \text{\AA}^2$ | $U_{22} / \text{\AA}^2$ | $U_{33} / \text{\AA}^2$ | $U_{12} / \text{\AA}^2$ | $U_{13} / \text{\AA}^2$ | $U_{23} / \text{\AA}^2$ |
|-------|-------------------------|-------------------------|-------------------------|-------------------------|-------------------------|-------------------------|
| Li(1) | 0.047 (17)              | 0.040 (16)              | 0.17 (2)                | 0.026 (9)               | -0.055 (14)             | -0.084 (14)             |
| Li(2) | 0.023 (7)               | 0.054 (9)               | 0.010 (2)               | 0                       | 0                       | 0                       |
| Li(3) | = $U_{22}(\text{Li}3)$  | 0.051 (7)               | 0.188 (14)              | -0.029 (6)              | = $-U_{23}(\text{Li}3)$ | -0.082(5)               |
| Li(4) | 0.057 (18)              | 0.047 (17)              | 0.075 (18)              | 0                       | 0                       | 0                       |

Space group  $P4_2/nmc$ ,  $a = 8.66414$  (9)  $\text{\AA}$ ,  $c = 12.5707$  (2)  $\text{\AA}$ ,  $R_{\text{wp}} = 3.80\%$ ,  $R_p = 3.18\%$ .

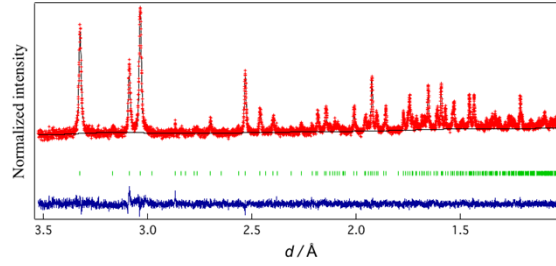

Figure S7. Neutron Rietveld refinement pattern of  $\text{Li}_{10.05}\text{Ge}_{1.05}\text{P}_{1.95}\text{S}_{12}$  at 135 K. Red: observed intensities; black: calculated intensities; blue: difference plot. The green markers indicate the positions of the diffraction lines.

Table S7. Rietveld refinement results for  $\text{Li}_{10.05}\text{Ge}_{1.05}\text{P}_{1.95}\text{S}_{12}$  at 135 K. ( $\text{Li}_{10+\delta}\text{Ge}_{1+\delta}\text{P}_{2-\delta}\text{S}_{12}$ ,  $\delta = 0.05$ )

| Atom  | Site | $g$        | $x$               | $y$               | $z$               | $U / \text{Å}^2$  |
|-------|------|------------|-------------------|-------------------|-------------------|-------------------|
| Ge(1) | 4d   | 0.525 (14) | 0                 | 1/2               | 0.6892 (2)        | 0.017             |
| P(1)  | 4d   | 0.475 (14) | = $x(\text{Ge}1)$ | = $y(\text{Ge}1)$ | = $z(\text{Ge}1)$ | = $B(\text{Ge}1)$ |
| Ge(2) | 2b   | 0.00 (3)   | 0                 | 0                 | 1/2               | 0.024             |
| P(2)  | 2b   | 1.00 (3)   | = $x(\text{Ge}2)$ | = $y(\text{Ge}2)$ | = $z(\text{Ge}2)$ | = $B(\text{Ge}2)$ |
| S(1)  | 8g   | 1          | 0                 | 0.1892 (5)        | 0.4086 (4)        | 0.025             |
| S(2)  | 8g   | 1          | 0                 | 0.2964 (6)        | 0.0960 (4)        | 0.017             |
| S(3)  | 8g   | 1          | 0                 | 0.6974 (5)        | 0.7896 (4)        | 0.017             |
| Li(1) | 16h  | 0.37 (2)   | 0.244 (2)         | 0.274 (2)         | 0.179 (2)         | 0.117             |
| Li(2) | 4d   | 1          | 0                 | 1/2               | 0.9461 (10)       | 0.050             |
| Li(3) | 8f   | 0.86 (2)   | = $y(\text{Li}3)$ | 0.2464 (8)        | 0                 | 0.110             |
| Li(4) | 4c   | 0.81 (2)   | 0                 | 0                 | 0.2528 (16)       | 0.087             |

| Atom  | $U_{11} / \text{Å}^2$  | $U_{22} / \text{Å}^2$  | $U_{33} / \text{Å}^2$  | $U_{12} / \text{Å}^2$  | $U_{13} / \text{Å}^2$   | $U_{23} / \text{Å}^2$  |
|-------|------------------------|------------------------|------------------------|------------------------|-------------------------|------------------------|
| Ge(1) | 0.022 (2)              | 0.021 (2)              | 0.009 (2)              | 0                      | 0                       | 0                      |
| P(1)  | = $U_{11}(\text{Ge}1)$ | = $U_{22}(\text{Ge}1)$ | = $U_{33}(\text{Ge}1)$ | = $U_{12}(\text{Ge}1)$ | = $U_{13}(\text{Ge}1)$  | = $U_{23}(\text{Ge}1)$ |
| Ge(2) | = $U_{22}(\text{Ge}2)$ | 0.011 (3)              | 0.051 (5)              | 0                      | 0                       | 0                      |
| P(2)  | = $U_{11}(\text{Ge}2)$ | = $U_{22}(\text{Ge}2)$ | = $U_{33}(\text{Ge}2)$ | = $U_{12}(\text{Ge}2)$ | = $U_{13}(\text{Ge}2)$  | = $U_{23}(\text{Ge}2)$ |
| S(1)  | 0.031 (4)              | 0.017 (4)              | 0.027 (5)              | 0                      | 0                       | -0.006 (2)             |
| S(2)  | 0.014 (4)              | 0.029 (4)              | 0.009 (4)              | 0                      | 0                       | -0.00009               |
| S(3)  | 0.029 (4)              | 0.019 (4)              | 0.004 (4)              | 0                      | 0                       | 0.003 (2)              |
| Li(1) | 0.059 (2)              | 0.052 (2)              | 0.24 (2)               | 0.038 (2)              | -0.071 (2)              | -0.100 (2)             |
| Li(2) | 0.071 (12)             | 0.041 (10)             | 0.039 (10)             | 0                      | 0                       | 0                      |
| Li(3) | = $U_{22}(\text{Li}3)$ | 0.052 (9)              | 0.226 (19)             | -0.025 (7)             | = $-U_{23}(\text{Li}3)$ | -0.080 (6)             |
| Li(4) | 0.06 (2)               | 0.11 (2)               | 0.09 (2)               | 0                      | 0                       | 0                      |

Space group  $P4_2/nmc$ ,  $a = 8.67527$  (9) Å,  $c = 12.5828$  (2) Å,  $R_{\text{wp}} = 3.72\%$ ,  $R_p = 3.14\%$ .



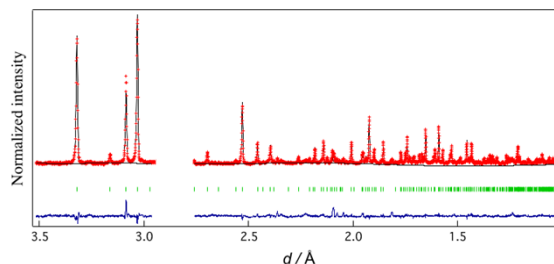

Figure S8. Neutron Rietveld refinement pattern of  $\text{Li}_{10.05}\text{Ge}_{1.05}\text{P}_{1.95}\text{S}_{12}$  at 300 K. Red: observed intensities; black: calculated intensities; blue: difference plot. The green markers indicate the positions of the diffraction lines.

Table S8. Rietveld refinement results for  $\text{Li}_{10.05}\text{Ge}_{1.05}\text{P}_{1.95}\text{S}_{12}$  at 300 K. ( $\text{Li}_{10+\delta}\text{Ge}_{1+\delta}\text{P}_{2-\delta}\text{S}_{12}$ ,  $\delta = 0.05$ )

| Atom  | Site | $g$        | $x$         | $y$         | $z$         | $U / \text{\AA}^2$ |
|-------|------|------------|-------------|-------------|-------------|--------------------|
| Ge(1) | 4d   | 0.525 (6)  | 0           | 1/2         | 0.6911      | 0.024              |
| P(1)  | 4d   | 0.475(6)   | = $x$ (Ge1) | = $y$ (Ge1) | = $z$ (Ge1) | = $U_{23}$ (Ge1)   |
| Ge(2) | 2b   | 0.00 (13)  | 0           | 0           | 1/2         | 0.028              |
| P(2)  | 2b   | 1.00 (13)  | = $x$ (Ge2) | = $y$ (Ge2) | = $z$ (Ge2) | = $U_{23}$ (Ge2)   |
| S(1)  | 8g   | 1          | 0           | 0.1890 (2)  | 0.4091 (2)  | 0.026              |
| S(2)  | 8g   | 1          | 0           | 0.2969 (2)  | 0.0982 (2)  | 0.025              |
| S(3)  | 8g   | 1          | 0           | 0.6935 (8)  | 0.7913 (7)  | 0.024              |
| Li(1) | 16h  | 0.380 (14) | 0.2566 (8)  | 0.2686 (8)  | 0.1889 (8)  | 0.105              |
| Li(2) | 4d   | 1.00 (2)   | 0           | 1/2         | 0.9468 (4)  | 0.064              |
| Li(3) | 8f   | 0.83 (2)   | = $y$ (Li3) | 0.2430 (4)  | 0           | 0.125              |
| Li(4) | 4c   | 0.84 (2)   | 0           | 0           | 0.2550 (5)  | 0.070              |

  

| Atom  | $U_{11} / \text{\AA}^2$ | $U_{22} / \text{\AA}^2$ | $U_{33} / \text{\AA}^2$ | $U_{12} / \text{\AA}^2$ | $U_{13} / \text{\AA}^2$ | $U_{23} / \text{\AA}^2$ |
|-------|-------------------------|-------------------------|-------------------------|-------------------------|-------------------------|-------------------------|
| Ge(1) | 0.0402 (10)             | 0.0207 (8)              | 0.0113 (7)              | 0                       | 0                       | 0                       |
| P(1)  | = $U_{11}$ (Ge1)        | = $U_{22}$ (Ge1)        | = $U_{33}$ (Ge1)        | = $U_{12}$ (Ge1)        | = $U_{13}$ (Ge1)        | = $U_{23}$ (Ge1)        |
| Ge(2) | = $U_{22}$ (Ge2)        | 0.0240(13)              | 0.0368 (18)             | 0                       | 0                       | 0                       |
| P(2)  | = $U_{11}$ (Ge2)        | = $U_{22}$ (Ge2)        | = $U_{33}$ (Ge2)        | = $U_{12}$ (Ge2)        | = $U_{13}$ (Ge2)        | = $U_{23}$ (Ge2)        |
| S(1)  | 0.0450 (15)             | 0.0128 (15)             | 0.0200 (16)             | 0                       | 0                       | 0.0033 (9)              |
| S(2)  | 0.0229 (16)             | 0.0272 (14)             | 0.0259 (17)             | 0                       | 0                       | -0.0036 (9)             |
| S(3)  | 0.0296 (15)             | 0.0151 (15)             | 0.0275 (16)             | 0                       | 0                       | -0.0023 (10)            |
| Li(1) | 0.045 (8)               | 0.039 (8)               | 0.230 (15)              | 0.017 (4)               | -0.040 (7)              | -0.036 (8)              |
| Li(2) | 0.110 (6)               | 0.059 (4)               | 0.024 (4)               | 0                       | 0                       | 0                       |
| Li(3) | = $U_{22}$ (Li3)        | 0.050 (4)               | 0.274 (10)              | -0.007 (3)              | =- $U_{23}$ (Li3)       | -0.052 (2)              |
| Li(4) | 0.019 (6)               | 0.118 (8)               | 0.074 (6)               | 0                       | 0                       | 0                       |

Space group  $P4_2/nmc$ ,  $a = 8.69440$  (2)  $\text{\AA}$ ,  $c = 12.60025$  (5)  $\text{\AA}$ ,  $R_{\text{wp}} = 2.85\%$ ,  $R_{\text{p}} = 2.09\%$ .

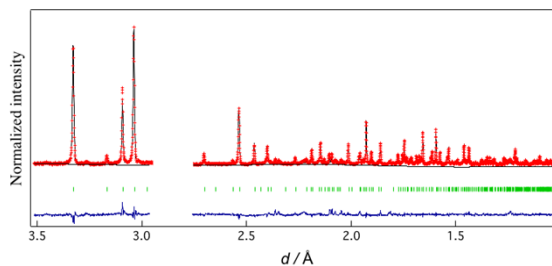

Figure S9. Neutron Rietveld refinement pattern of  $\text{Li}_{10.05}\text{Ge}_{1.05}\text{P}_{1.95}\text{S}_{12}$  at 450 K. Red: observed intensities; black: calculated intensities; blue: difference plot. The green markers indicate the positions of the diffraction lines.

Table S9. Rietveld refinement results for  $\text{Li}_{10.05}\text{Ge}_{1.05}\text{P}_{1.95}\text{S}_{12}$  at 450 K. ( $\text{Li}_{10+\delta}\text{Ge}_{1+\delta}\text{P}_{2-\delta}\text{S}_{12}$ ,  $\delta = 0.05$ )

| Atom  | Site | $g$        | $x$               | $y$               | $z$               | $U / \text{\AA}^2$     |
|-------|------|------------|-------------------|-------------------|-------------------|------------------------|
| Ge(1) | 4d   | 0.525 (5)  | 0                 | 1/2               | 0.6915            | 0.026                  |
| P(1)  | 4d   | 0.475 (5)  | = $x(\text{Ge}1)$ | = $y(\text{Ge}1)$ | = $z(\text{Ge}1)$ | = $U_{23}(\text{Ge}1)$ |
| Ge(2) | 2b   | 0.00 (13)  | 0                 | 0                 | 1/2               | 0.036                  |
| P(2)  | 2b   | 1.00 (13)  | = $x(\text{Ge}2)$ | = $y(\text{Ge}2)$ | = $z(\text{Ge}2)$ | = $U_{23}(\text{Ge}2)$ |
| S(1)  | 8g   | 1          | 0                 | 0.1886 (2)        | 0.4081 (13)       | 0.035                  |
| S(2)  | 8g   | 1          | 0                 | 0.2990 (2)        | 0.1032 (13)       | 0.033                  |
| S(3)  | 8g   | 1          | 0                 | 0.6949 (2)        | 0.7900 (13)       | 0.034                  |
| Li(1) | 16h  | 0.383 (12) | 0.2549 (9)        | 0.2573 (10)       | 0.1930 (7)        | 0.159                  |
| Li(2) | 4d   | 1.00 (2)   | 0                 | 1/2               | 0.9470 (5)        | 0.113                  |
| Li(3) | 8f   | 0.81 (2)   | = $y(\text{Li}3)$ | 0.2421 (3)        | 0                 | 0.158                  |
| Li(4) | 4c   | 0.86 (2)   | 0                 | 0                 | 0.2535 (4)        | 0.071                  |

  

| Atom  | $U_{11} / \text{\AA}^2$ | $U_{22} / \text{\AA}^2$ | $U_{33} / \text{\AA}^2$ | $U_{12} / \text{\AA}^2$ | $U_{13} / \text{\AA}^2$ | $U_{23} / \text{\AA}^2$ |
|-------|-------------------------|-------------------------|-------------------------|-------------------------|-------------------------|-------------------------|
| Ge(1) | 0.0351 (8)              | 0.0318 (8)              | 0.0115 (5)              | 0                       | 0                       | 0                       |
| P(1)  | = $U_{11}(\text{Ge}1)$  | = $U_{22}(\text{Ge}1)$  | = $U_{33}(\text{Ge}1)$  | = $U_{12}(\text{Ge}1)$  | = $U_{13}(\text{Ge}1)$  | = $U_{23}(\text{Ge}1)$  |
| Ge(2) | = $U_{22}(\text{Ge}2)$  | 0.0337 (12)             | 0.0410 (16)             | 0                       | 0                       | 0                       |
| P(2)  | = $U_{11}(\text{Ge}2)$  | = $U_{22}(\text{Ge}2)$  | = $U_{33}(\text{Ge}2)$  | = $U_{12}(\text{Ge}2)$  | = $U_{13}(\text{Ge}2)$  | = $U_{23}(\text{Ge}2)$  |
| S(1)  | 0.0648 (14)             | 0.0032 (11)             | 0.0377 (16)             | 0                       | 0                       | 0.0046 (8)              |
| S(2)  | 0.0275 (15)             | 0.0417 (14)             | 0.0305 (14)             | 0                       | 0                       | -0.0007 (9)             |
| S(3)  | 0.0310 (15)             | 0.0283 (14)             | 0.0416 (16)             | 0                       | 0                       | 0.0016 (10)             |
| Li(1) | 0.064 (8)               | 0.089 (9)               | 0.323 (19)              | 0.057 (4)               | -0.065 (9)              | -0.141 (12)             |
| Li(2) | 0.149 (7)               | 0.088 (5)               | 0.103 (5)               | 0                       | 0                       | 0                       |
| Li(3) | = $U_{22}(\text{Li}3)$  | 0.057 (4)               | 0.359 (10)              | -0.006 (3)              | = $-U_{23}(\text{Li}3)$ | -0.089 (3)              |
| Li(4) | 0.048 (6)               | 0.125 (7)               | 0.039 (4)               | 0                       | 0                       | 0                       |

Space group  $P4_2/nmc$ ,  $a = 8.71831$  (2)  $\text{\AA}$ ,  $c = 12.62836$  (4)  $\text{\AA}$ ,  $R_{\text{wp}} = 3.84\%$ ,  $R_p = 3.11\%$ .

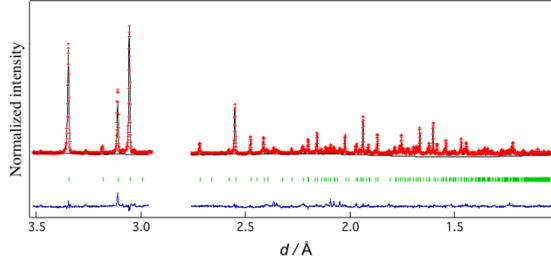

Figure S10. Neutron Rietveld refinement pattern of  $\text{Li}_{10.05}\text{Ge}_{1.05}\text{P}_{1.95}\text{S}_{12}$  at 750 K. Red: observed intensities; black: calculated intensities; blue: difference plot. The green markers indicate the positions of the diffraction lines.

Table S10. Rietveld refinement results for  $\text{Li}_{10.05}\text{Ge}_{1.05}\text{P}_{1.95}\text{S}_{12}$  at 750 K. ( $\text{Li}_{10+\delta}\text{Ge}_{1+\delta}\text{P}_{2-\delta}\text{S}_{12}$ ,  $\delta = 0.05$ )

| Atom  | Site | $g$        | $x$               | $y$               | $z$               | $U / \text{\AA}^2$     |
|-------|------|------------|-------------------|-------------------|-------------------|------------------------|
| Ge(1) | 4d   | 0.525 (5)  | 0                 | 1/2               | 0.6932            | 0.024                  |
| P(1)  | 4d   | 0.475 (5)  | = $x(\text{Ge}1)$ | = $y(\text{Ge}1)$ | = $z(\text{Ge}1)$ | = $U_{23}(\text{Ge}1)$ |
| Ge(2) | 2b   | 0.00 (14)  | 0                 | 0                 | 1/2               | 0.040                  |
| P(2)  | 2b   | 1.00 (14)  | = $x(\text{Ge}2)$ | = $y(\text{Ge}2)$ | = $z(\text{Ge}2)$ | = $U_{23}(\text{Ge}2)$ |
| S(1)  | 8g   | 1          | 0                 | 0.1855 (2)        | 0.4097 (13)       | 0.044                  |
| S(2)  | 8g   | 1          | 0                 | 0.2971 (2)        | 0.1035 (14)       | 0.034                  |
| S(3)  | 8g   | 1          | 0                 | 0.6955 (2)        | 0.7887 (15)       | 0.041                  |
| Li(1) | 16h  | 0.385 (17) | 0.2510 (18)       | 0.2663 (19)       | 0.1999 (8)        | 0.175                  |
| Li(2) | 4d   | 1.000 (6)  | 0                 | 1/2               | 0.9533 (4)        | 0.095                  |
| Li(3) | 8f   | 0.80 (3)   | = $y(\text{Li}3)$ | 0.2491 (5)        | 0                 | 0.251                  |
| Li(4) | 4c   | 0.87 (4)   | 0                 | 0                 | 0.2528 (6)        | 0.160                  |

  

| Atom  | $U_{11} / \text{\AA}^2$ | $U_{22} / \text{\AA}^2$ | $U_{33} / \text{\AA}^2$ | $U_{12} / \text{\AA}^2$ | $U_{13} / \text{\AA}^2$ | $U_{23} / \text{\AA}^2$ |
|-------|-------------------------|-------------------------|-------------------------|-------------------------|-------------------------|-------------------------|
| Ge(1) | 0.0277 (8)              | 0.0294 (9)              | 0.0155 (6)              | 0                       | 0                       | 0                       |
| P(1)  | = $U_{11}(\text{Ge}1)$  | = $U_{22}(\text{Ge}1)$  | = $U_{33}(\text{Ge}1)$  | = $U_{12}(\text{Ge}1)$  | = $U_{13}(\text{Ge}1)$  | = $U_{23}(\text{Ge}1)$  |
| Ge(2) | = $U_{22}(\text{Ge}2)$  | 0.0410 (13)             | 0.0370 (18)             | 0                       | 0                       | 0                       |
| P(2)  | = $U_{11}(\text{Ge}2)$  | = $U_{22}(\text{Ge}2)$  | = $U_{33}(\text{Ge}2)$  | = $U_{12}(\text{Ge}2)$  | = $U_{13}(\text{Ge}2)$  | = $U_{23}(\text{Ge}2)$  |
| S(1)  | 0.0709 (16)             | 0.0284 (15)             | 0.0333 (17)             | 0                       | 0                       | 0.0031 (10)             |
| S(2)  | 0.0388 (16)             | 0.0306 (14)             | 0.0326 (15)             | 0                       | 0                       | -0.0251 (9)             |
| S(3)  | 0.0333 (16)             | 0.0287 (14)             | 0.0602 (19)             | 0                       | 0                       | 0.0068 (12)             |
| Li(1) | 0.130 (12)              | 0.046 (10)              | 0.35 (3)                | -0.011 (5)              | 0.017 (17)              | -0.042 (17)             |
| Li(2) | 0.068 (4)               | 0.147 (6)               | 0.071 (5)               | 0                       | 0                       | 0                       |
| Li(3) | = $U_{22}(\text{Li}3)$  | 0.148 (7)               | 0.456 (19)              | -0.029 (5)              | = $-U_{23}(\text{Li}3)$ | -0.147 (5)              |
| Li(4) | 0.160 (10)              | 0.234 (14)              | 0.085 (9)               | 0                       | 0                       | 0                       |

Space group  $P4_2/nmc$ ,  $a = 8.76823$  (11)  $\text{\AA}$ ,  $c = 12.69081$  (3)  $\text{\AA}$ ,  $R_{\text{wp}} = 4.80\%$ ,  $R_p = 3.81\%$ .

Table S11. Interatomic distances ( $l / \text{\AA}$ ) and bond angles ( $\theta / ^\circ$ ) for  $\text{Li}_{10+\delta}\text{Ge}_{1+\delta}\text{P}_{2-\delta}\text{S}_{12}$ 

|                                           | Polyhedra structure                                | Bond                                               | $\delta=0.00$  | $\delta=0.05$  | $\delta=0.20$  | $\delta=0.35$  | $\delta=0.50$  |
|-------------------------------------------|----------------------------------------------------|----------------------------------------------------|----------------|----------------|----------------|----------------|----------------|
| Interatomic distance ( $l / \text{\AA}$ ) | Ge1S <sub>4</sub><br>(Tetrahedra)                  | Ge1 <sup>a</sup> -S2 <sup>b</sup>                  | 2.122          | 2.119          | 2.132          | 2.109          | 2.153          |
|                                           |                                                    | Ge1 <sup>c</sup> -S3 <sup>c</sup>                  | 2.146          | 2.102          | 2.139          | 2.166          | 2.126          |
|                                           |                                                    | <b>Average Ge1-S</b>                               | <b>2.134</b>   | <b>2.111</b>   | <b>2.136</b>   | <b>2.138</b>   | <b>2.139</b>   |
|                                           | P2S <sub>4</sub><br>(Tetrahedra)                   | P2 <sup>b</sup> -S1 <sup>d</sup>                   | 1.961          | 2.004          | 1.991          | 2.030          | 2.005          |
|                                           |                                                    | <b>Average P2-S</b>                                | <b>2.005</b>   | <b>2.004</b>   | <b>1.991</b>   | <b>2.030</b>   | <b>2.005</b>   |
|                                           | Li1S <sub>4</sub><br>(Tetrahedra)                  | Li1 <sup>b</sup> -S1 <sup>h</sup>                  | 2.449          | 2.478          | 2.467          | 2.638          | 2.516          |
|                                           |                                                    | Li1 <sup>b</sup> -S2 <sup>b</sup>                  | 2.496          | 2.519          | 2.517          | 2.538          | 2.538          |
|                                           |                                                    | Li1 <sup>b</sup> -S3 <sup>f</sup>                  | 2.465          | 2.452          | 2.475          | 2.382          | 2.477          |
|                                           |                                                    | Li1 <sup>b</sup> -S3 <sup>d</sup>                  | 2.418          | 2.388          | 2.381          | 2.325          | 2.333          |
|                                           |                                                    | <b>Average Li1-S</b>                               | <b>2.457</b>   | <b>2.459</b>   | <b>2.460</b>   | <b>2.471</b>   | <b>2.466</b>   |
|                                           | Li2S <sub>6</sub><br>(Octahedra)                   | Li2 <sup>a</sup> -S1 <sup>d</sup>                  | 2.779          | 2.745          | 2.766          | 2.738          | 2.732          |
|                                           |                                                    | Li2 <sup>a</sup> -S2 <sup>f</sup>                  | 2.577          | 2.599          | 2.603          | 2.568          | 2.652          |
|                                           |                                                    | Li2 <sup>a</sup> -S3 <sup>g</sup>                  | 2.592          | 2.583          | 2.602          | 2.718          | 2.563          |
|                                           |                                                    | <b>Average Li2-S</b>                               | <b>2.649</b>   | <b>2.642</b>   | <b>2.657</b>   | <b>2.675</b>   | <b>2.649</b>   |
|                                           | Li3S <sub>4</sub><br>(Tetrahedra)                  | Li3 <sup>b</sup> -S1 <sup>h</sup>                  | 2.551          | 2.578          | 2.580          | 2.548          | 2.530          |
| Li3 <sup>b</sup> -S2 <sup>b</sup>         |                                                    | 2.496                                              | 2.494          | 2.494          | 2.522          | 2.512          |                |
| <b>Average Li3-S</b>                      |                                                    | <b>2.523</b>                                       | <b>2.536</b>   | <b>2.537</b>   | <b>2.535</b>   | <b>2.521</b>   |                |
| Li4S <sub>6</sub><br>(Octahedra)          | Li4 <sup>b</sup> -S1 <sup>b</sup>                  |                                                    | 2.544          | 2.641          | 2.534          | 2.776          |                |
|                                           | Li4 <sup>b</sup> -S3 <sup>c</sup>                  |                                                    | 2.728          | 2.680          | 2.665          | 2.669          |                |
|                                           | Li4 <sup>a</sup> -S2 <sup>e</sup>                  |                                                    | 3.251          | 3.167          | 3.273          | 3.072          |                |
|                                           | <b>Average Li2-S</b>                               |                                                    | <b>2.841</b>   | <b>2.829</b>   | <b>2.824</b>   | <b>2.839</b>   |                |
| Bond angle ( $\theta / ^\circ$ )          | Ge1S <sub>4</sub><br>(Tetrahedra)                  | S2 <sup>b</sup> -Ge1 <sup>a</sup> -S2 <sup>g</sup> | 110.763        | 112.792        | 113.394        | 115.052        | 113.870        |
|                                           |                                                    | S2 <sup>b</sup> -Ge1 <sup>c</sup> -S3 <sup>c</sup> | 109.631        | 109.373        | 109.208        | 108.257        | 109.121        |
|                                           |                                                    | S3 <sup>c</sup> -Ge1 <sup>c</sup> -S3 <sup>d</sup> | 107.492        | 106.350        | 106.378        | 108.610        | 106.204        |
|                                           |                                                    | <b>Average S-Ge1-S</b>                             | <b>109.463</b> | <b>109.439</b> | <b>109.434</b> | <b>109.448</b> | <b>109.426</b> |
|                                           | P2S <sub>4</sub><br>(Tetrahedra)                   | S1 <sup>h</sup> -P2 <sup>a</sup> -S1 <sup>e</sup>  | 109.607        | 110.290        | 109.748        | 111.050        | 110.897        |
|                                           |                                                    | S1 <sup>h</sup> -P2 <sup>b</sup> -S1 <sup>b</sup>  | 109.403        | 109.063        | 109.333        | 108.687        | 108.763        |
|                                           |                                                    | <b>Average S-P2-S</b>                              | <b>109.471</b> | <b>109.472</b> | <b>109.471</b> | <b>109.475</b> | <b>109.474</b> |
|                                           | Li2S <sub>6</sub><br>(Octahedra)                   | S1 <sup>b</sup> -Li2 <sup>a</sup> -S1 <sup>g</sup> | 162.104        | 160.076        | 159.994        | 156.888        | 162.328        |
|                                           |                                                    | S1 <sup>b</sup> -Li2 <sup>a</sup> -S2 <sup>f</sup> | 96.567         | 97.296         | 97.274         | 98.306         | 96.465         |
|                                           |                                                    | S1 <sup>b</sup> -Li2 <sup>a</sup> -S3 <sup>a</sup> | 83.349         | 82.458         | 82.486         | 81.216         | 83.400         |
|                                           |                                                    | S2 <sup>f</sup> -Li2 <sup>a</sup> -S2 <sup>a</sup> | 85.336         | 85.541         | 86.414         | 87.709         | 85.722         |
|                                           |                                                    | S2 <sup>f</sup> -Li2 <sup>a</sup> -S3 <sup>f</sup> | 179.203        | 177.879        | 177.955        | 176.479        | 178.703        |
|                                           |                                                    | S2 <sup>a</sup> -Li2 <sup>a</sup> -S3 <sup>a</sup> | 95.461         | 96.580         | 95.631         | 95.812         | 95.575         |
|                                           |                                                    | S3 <sup>a</sup> -Li2 <sup>a</sup> -S3 <sup>a</sup> | 83.742         | 81.299         | 82.324         | 80.667         | 83.128         |
|                                           |                                                    | <b>Average S-Li2-S</b>                             | <b>89.972</b>  | <b>89.918</b>  | <b>89.920</b>  | <b>89.841</b>  | <b>89.955</b>  |
| Li4S <sub>6</sub><br>(Octahedra)          | S1 <sup>b</sup> -Li4 <sup>b</sup> -S1 <sup>b</sup> |                                                    | 80.505         | 76.108         | 82.685         | 73.015         |                |
|                                           | S1 <sup>b</sup> -Li4 <sup>b</sup> -S2 <sup>b</sup> |                                                    | 87.165         | 87.698         | 86.707         | 86.467         |                |
|                                           | S1 <sup>b</sup> -Li4 <sup>b</sup> -S2 <sup>g</sup> |                                                    | 167.676        | 163.812        | 169.395        | 160.499        |                |
|                                           | S1 <sup>b</sup> -Li4 <sup>b</sup> -S3 <sup>c</sup> |                                                    | 99.398         | 97.762         | 99.645         | 95.345         |                |
|                                           | S2 <sup>a</sup> -Li4 <sup>b</sup> -S2 <sup>b</sup> |                                                    | 105.159        | 108.490        | 103.898        | 112.034        |                |
|                                           | S2 <sup>a</sup> -Li4 <sup>b</sup> -S3 <sup>d</sup> |                                                    | 82.533         | 84.238         | 82.069         | 86.286         |                |
|                                           | S3 <sup>d</sup> -Li4 <sup>b</sup> -S3 <sup>c</sup> |                                                    | 155.292        | 160.247        | 154.156        | 166.681        |                |
| <b>Average S-Li4-S</b>                    |                                                    | <b>90.643</b>                                      | <b>90.666</b>  | <b>90.571</b>  | <b>90.376</b>  |                |                |

Symmetry codes: <sup>a</sup>-y+1/2, x+1/2, z+1/2, <sup>b</sup>x, y, z, <sup>c</sup>y, x, -z, <sup>d</sup>-y, -x, -z, <sup>e</sup>-x+1/2, y+1/2, -z+1/2, <sup>f</sup>y+1/2, -x+1/2, z+1/2, <sup>g</sup>-x, -y, z, <sup>h</sup>x+1/2, -y+1/2, -z+1/2
